# Supplementary material
Source: PubMed Central journal article supplement (PMC3186939)

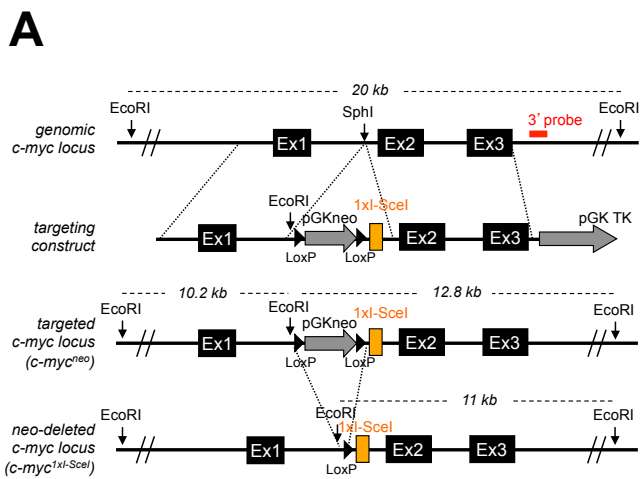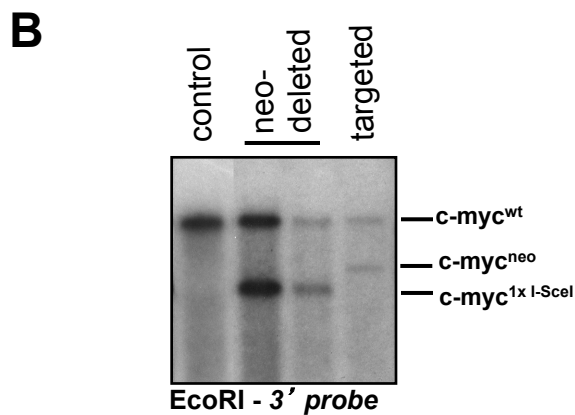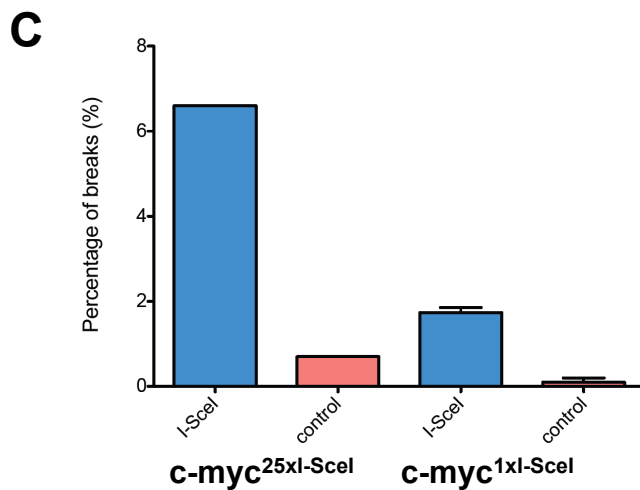

| genotype                   | mouse # |   | MPs | breaks | %   |
|----------------------------|---------|---|-----|--------|-----|
| <i>c-myc<sup>25x</sup></i> | 858     | C | 92  | 1      | 1.1 |
|                            |         | I | 264 | 20     | 7.6 |
| <i>c-myc<sup>1x</sup></i>  | 9       | C | 86  | 0      | 0.0 |
|                            |         | I | 262 | 5      | 1.9 |
| <i>c-myc<sup>25x</sup></i> | 749     | C | 353 | 1      | 0.3 |
|                            |         | I | 354 | 20     | 5.6 |
| <i>c-myc<sup>1x</sup></i>  | 2       | C | 397 | 1      | 0.3 |
|                            |         | I | 342 | 5      | 1.5 |
| <i>c-myc<sup>1x</sup></i>  | 10      | C | 303 | 0      | 0.0 |
|                            |         | I | 388 | 7      | 1.8 |

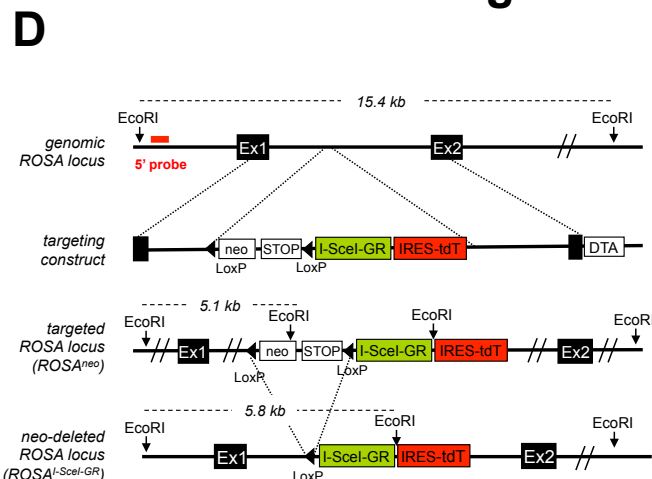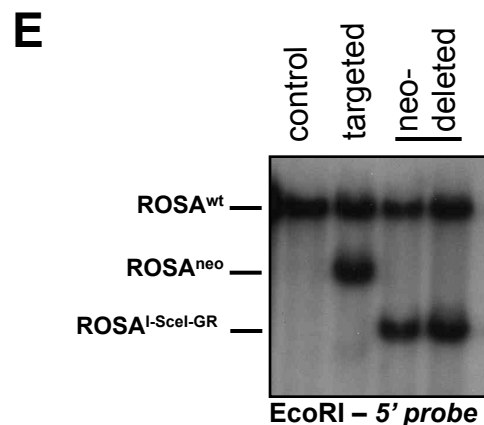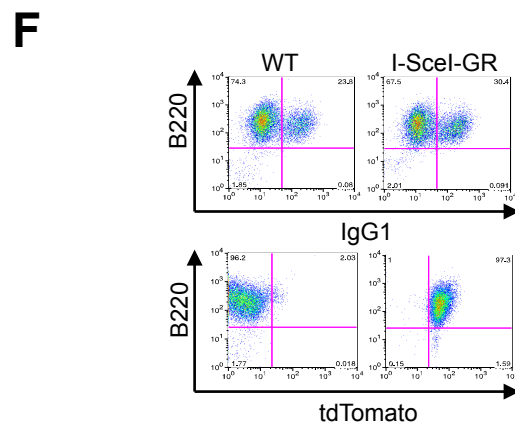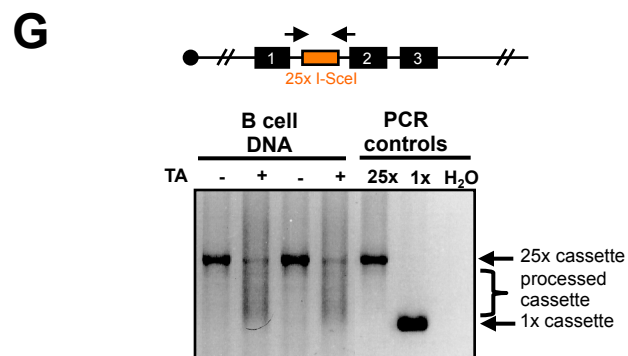

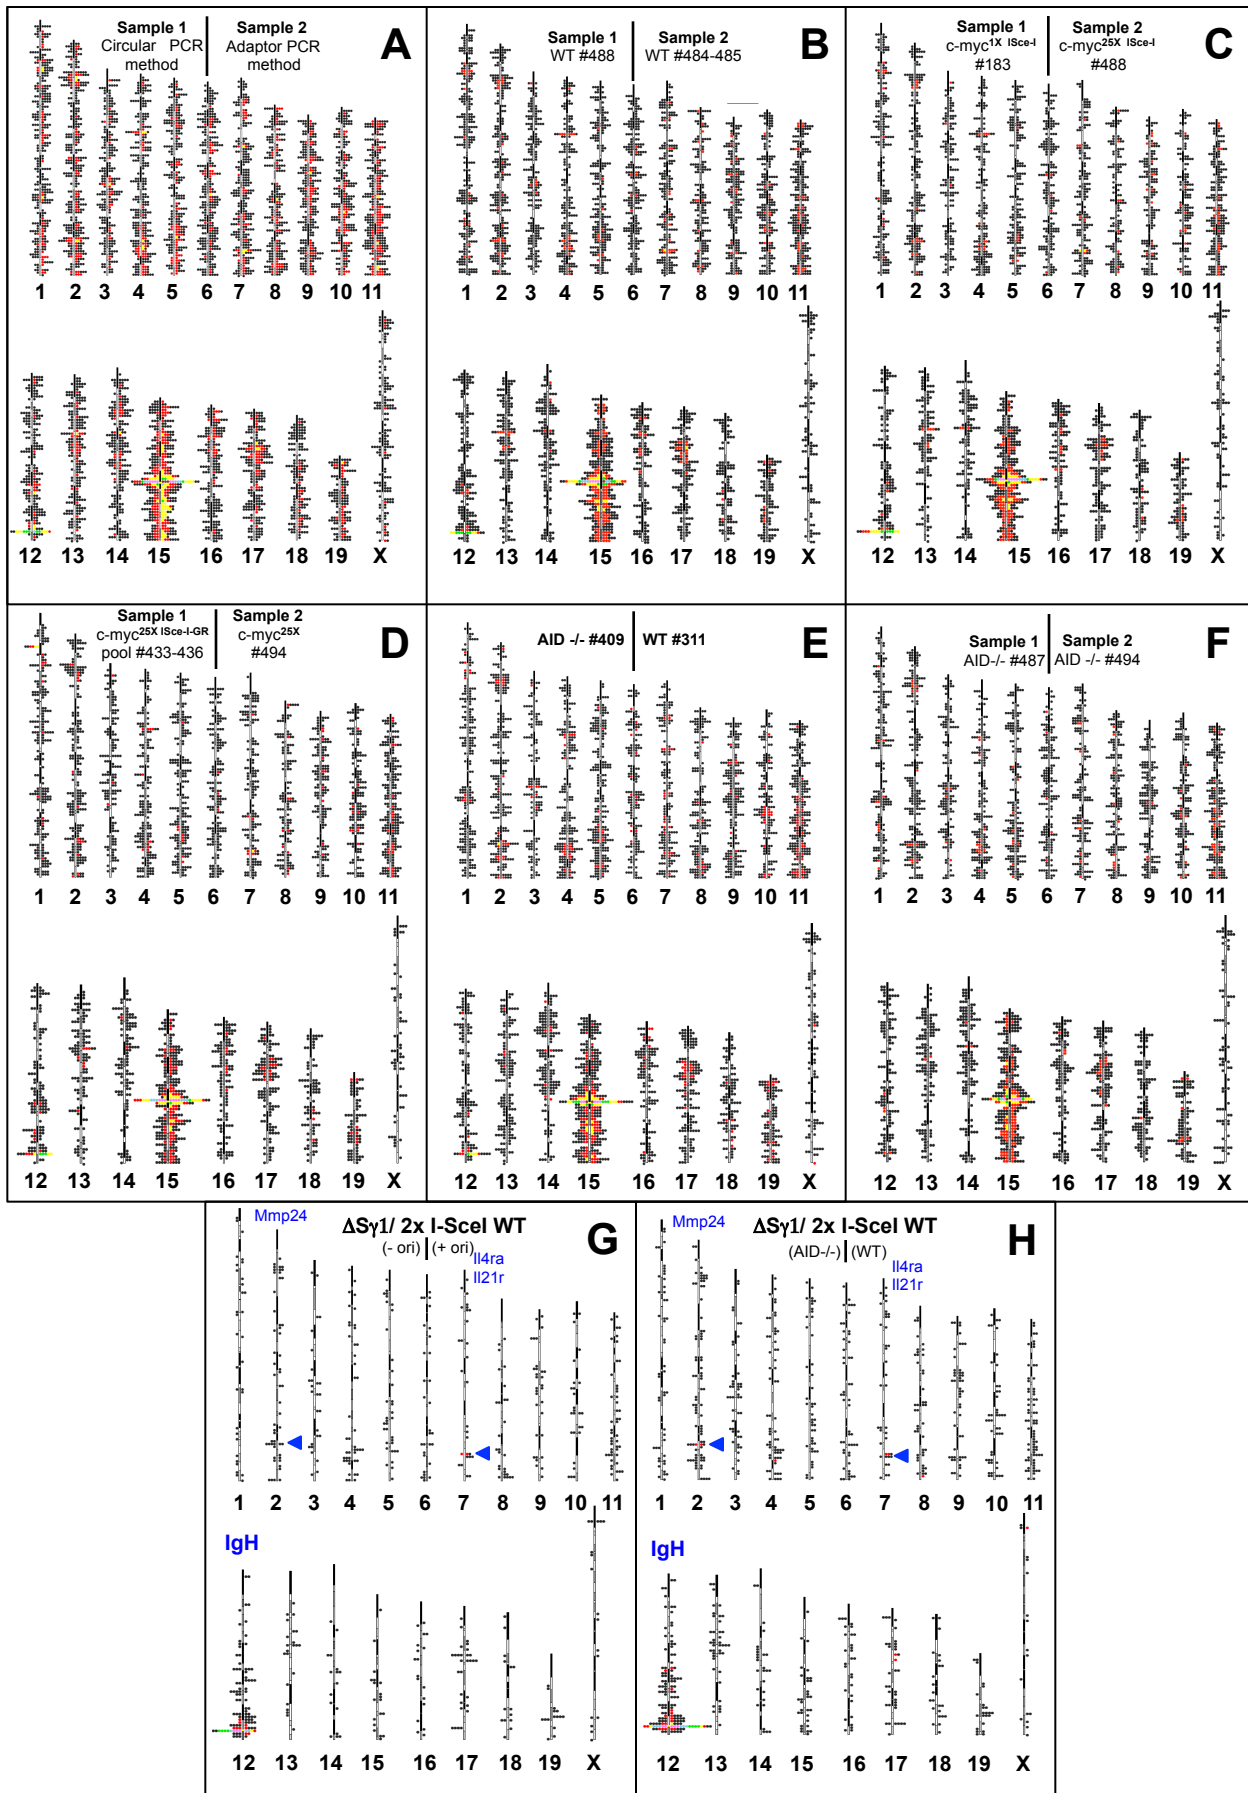

*c-myc*

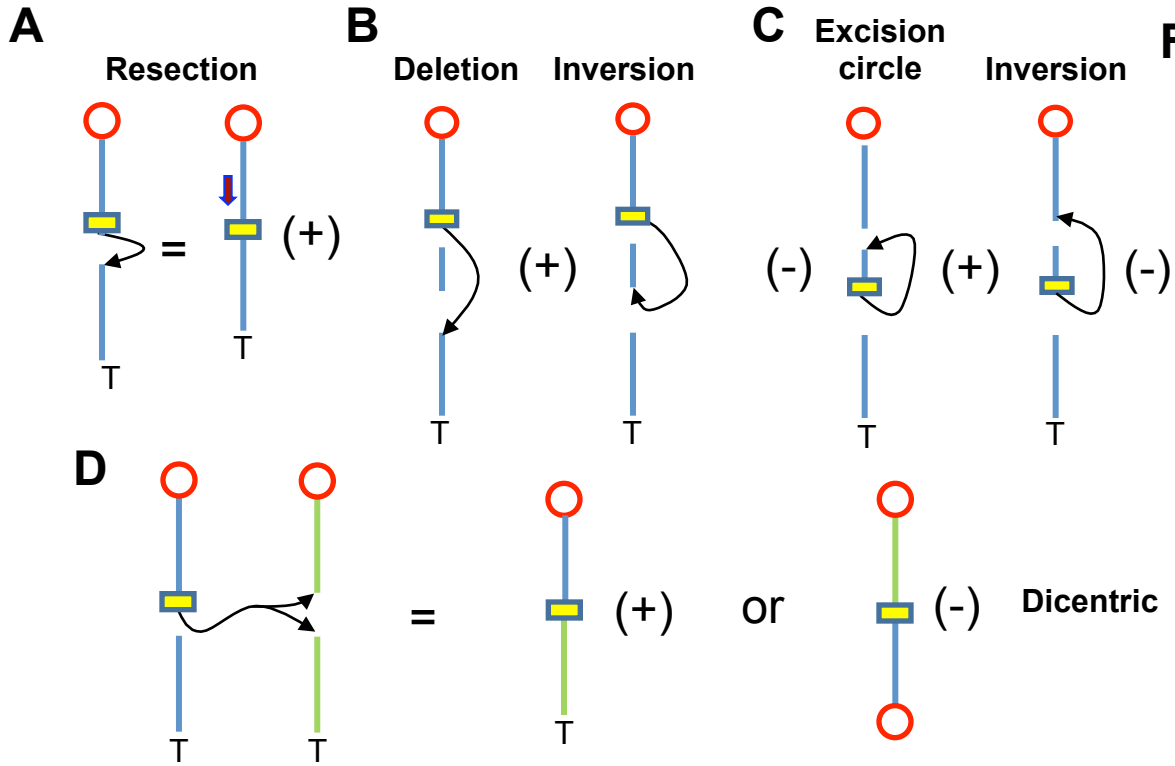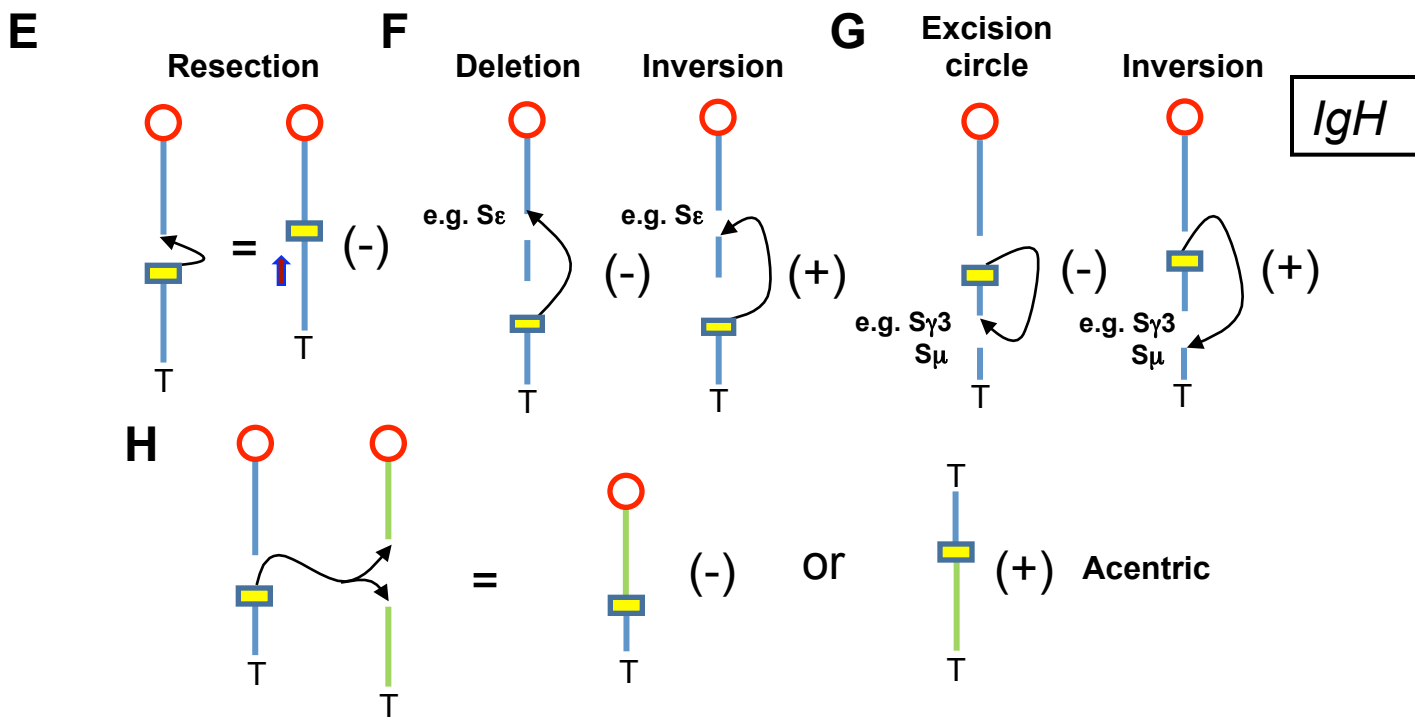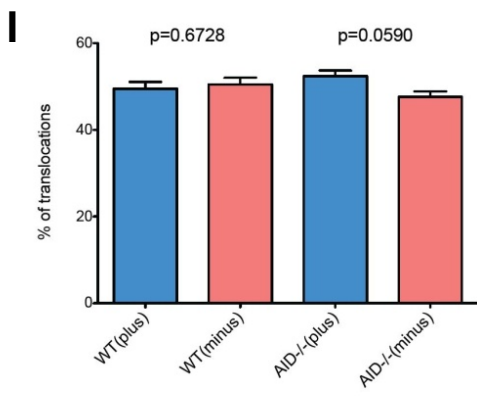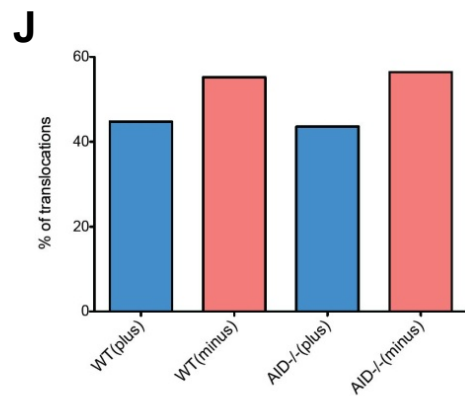

A

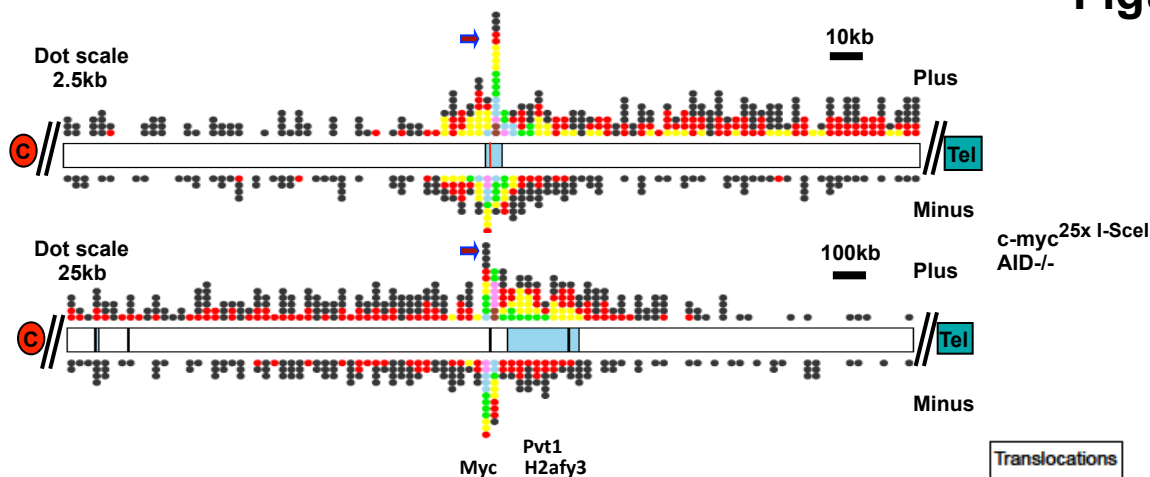

B

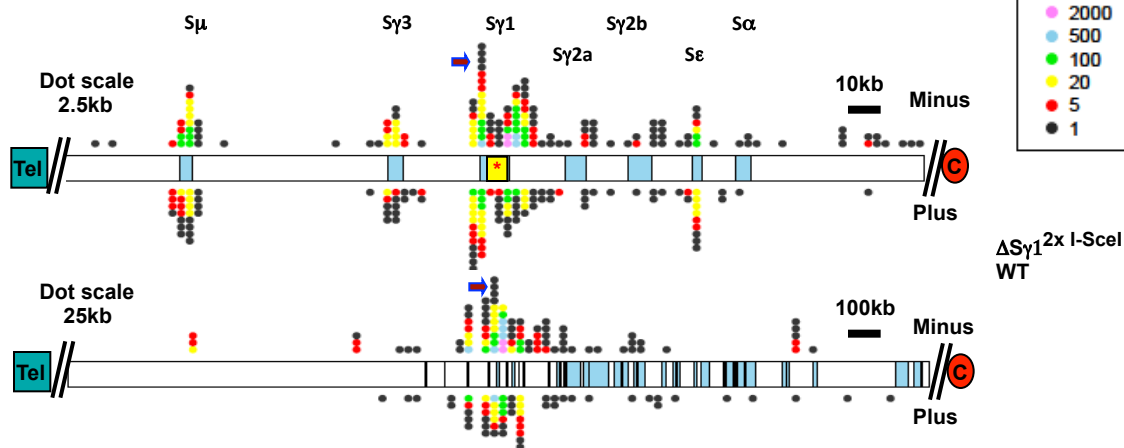

C

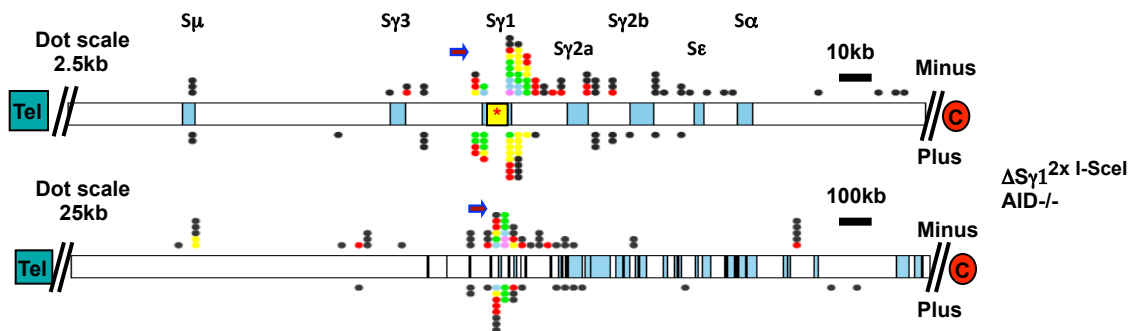

D

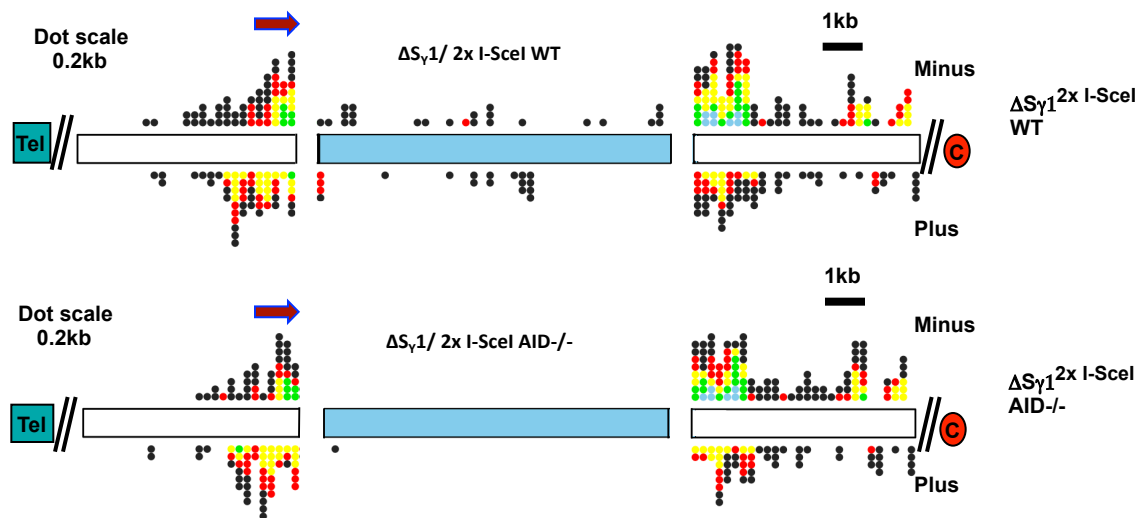

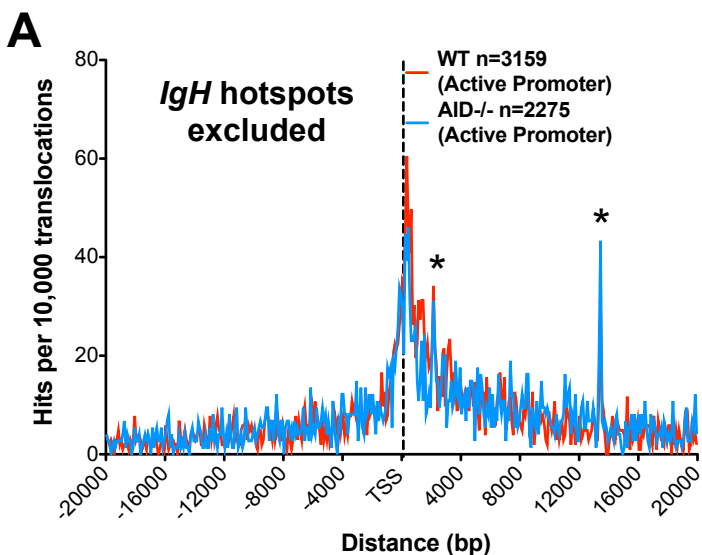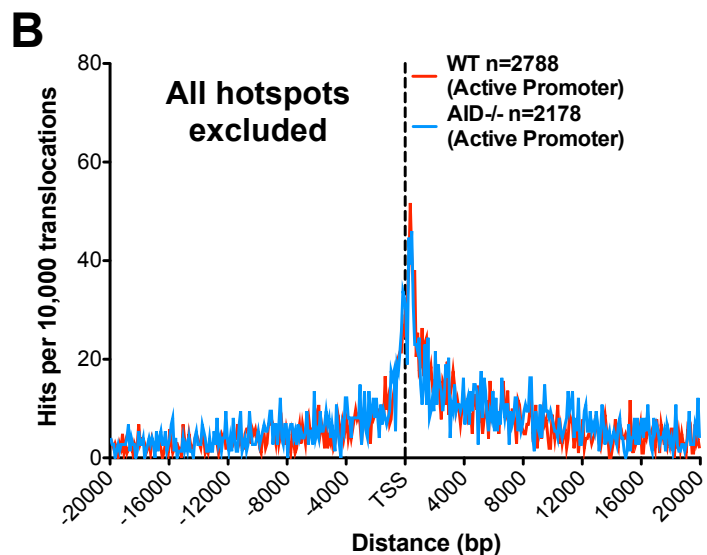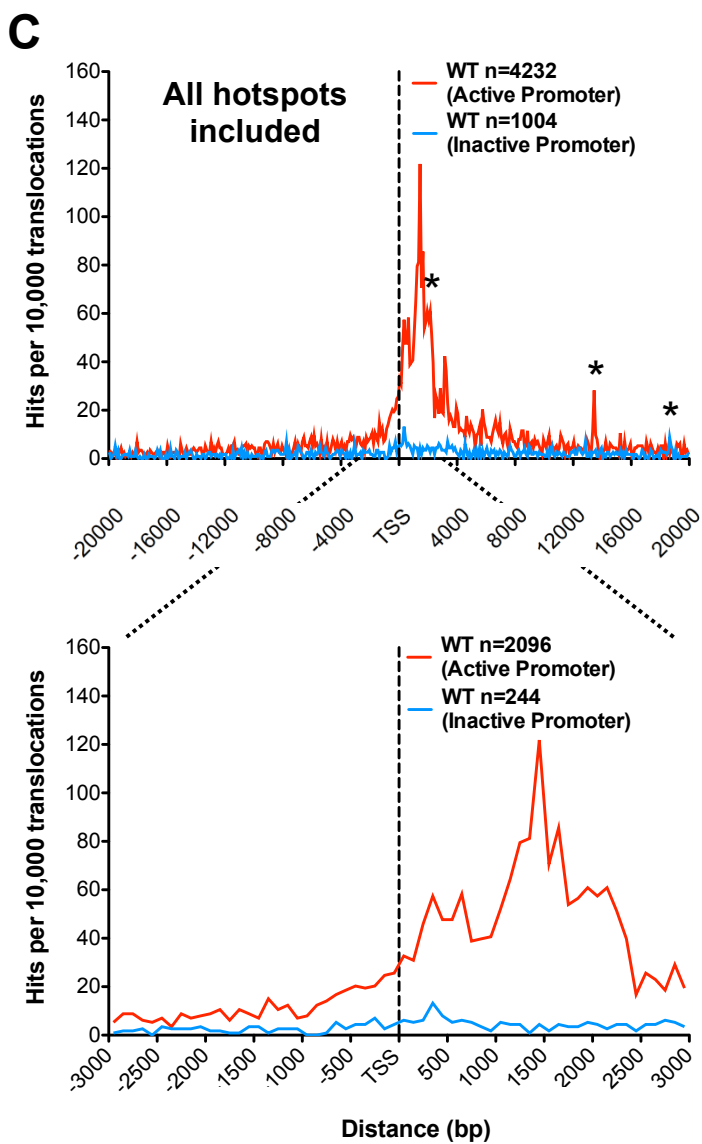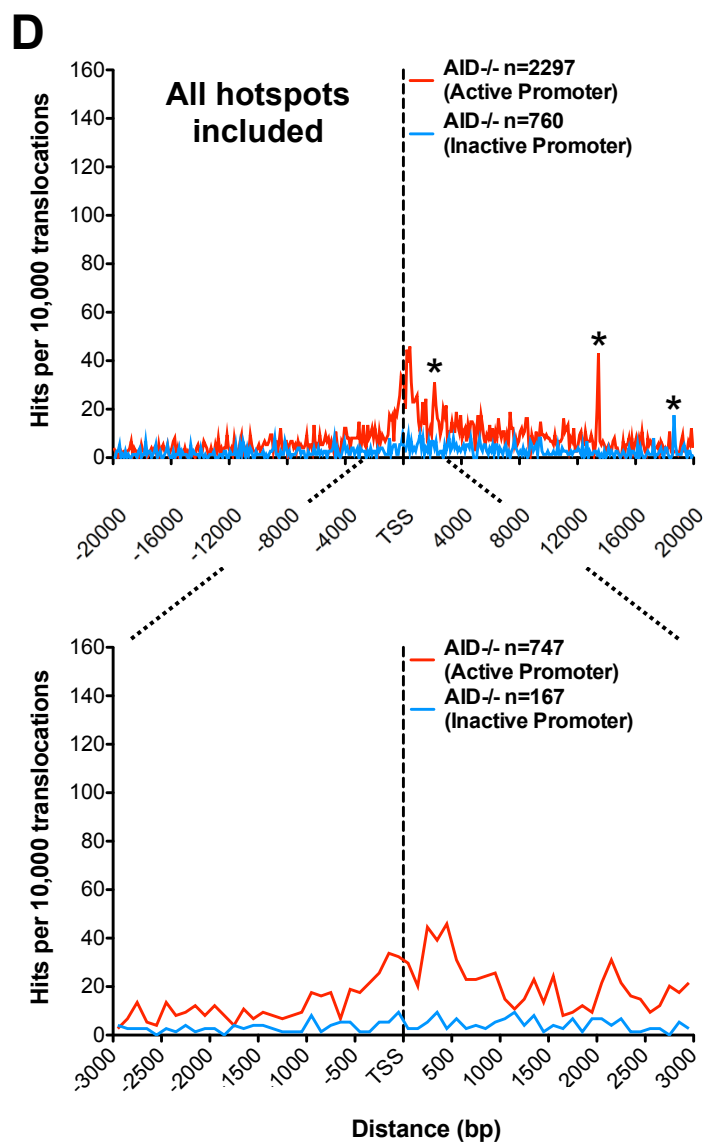

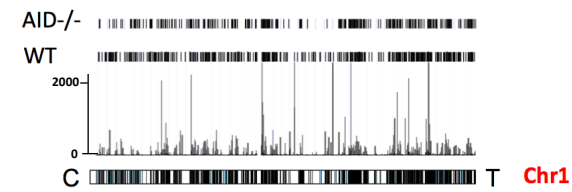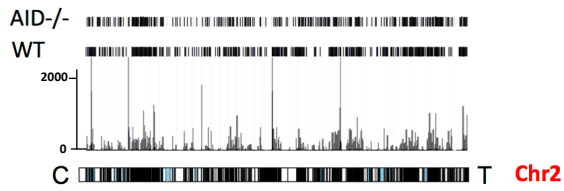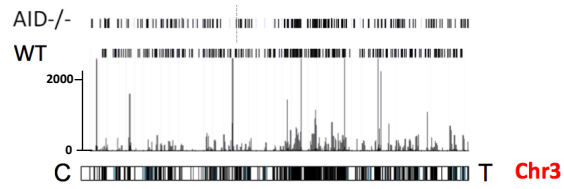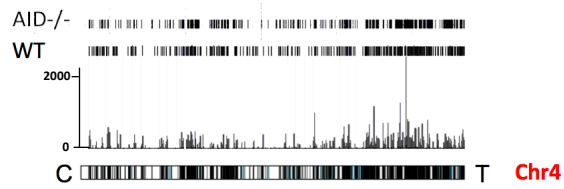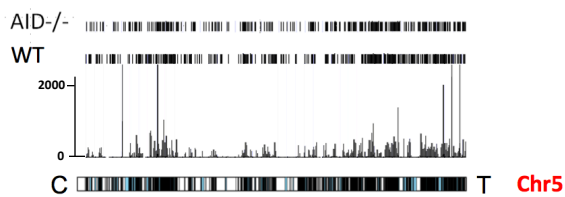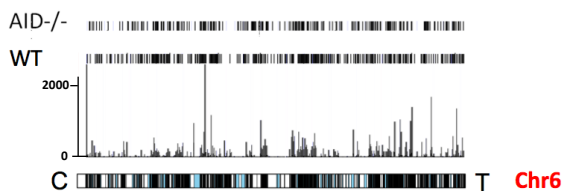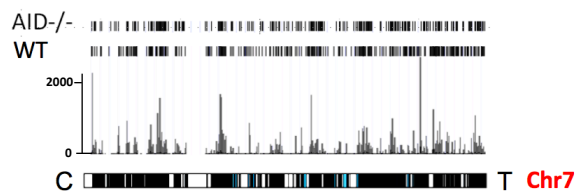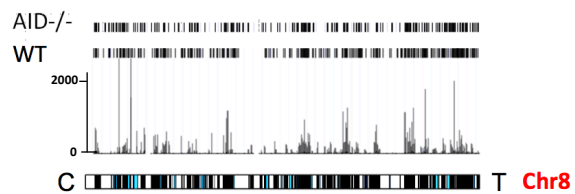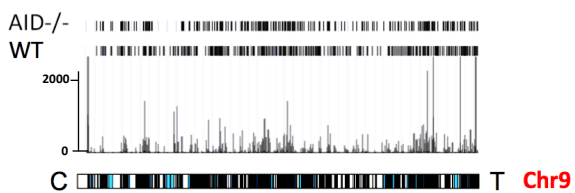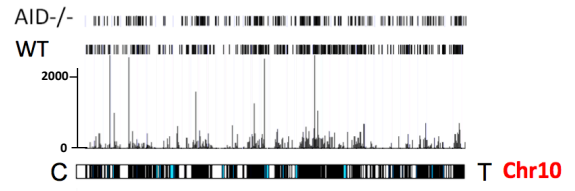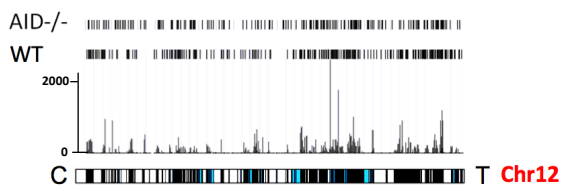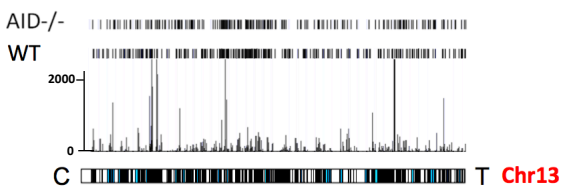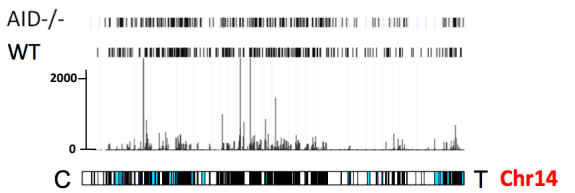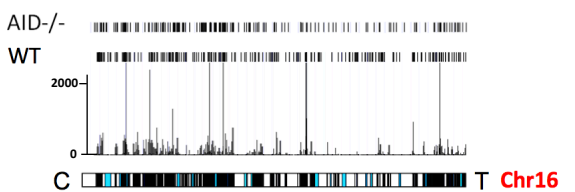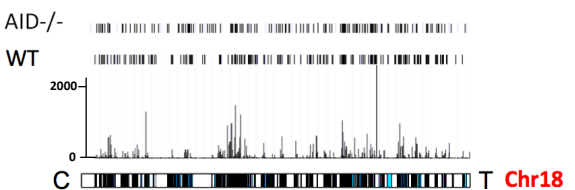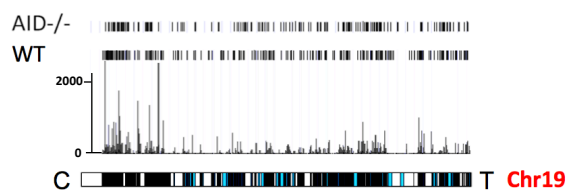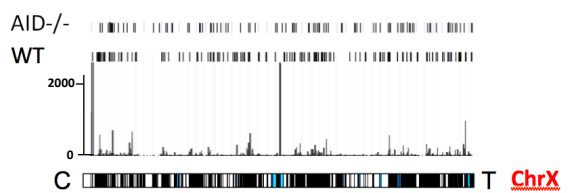

**Figure S7**

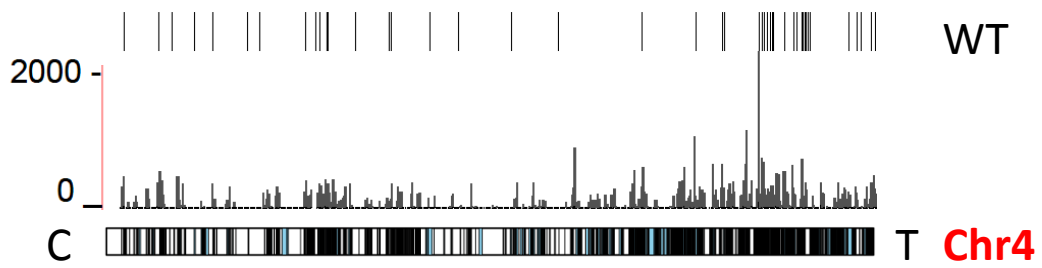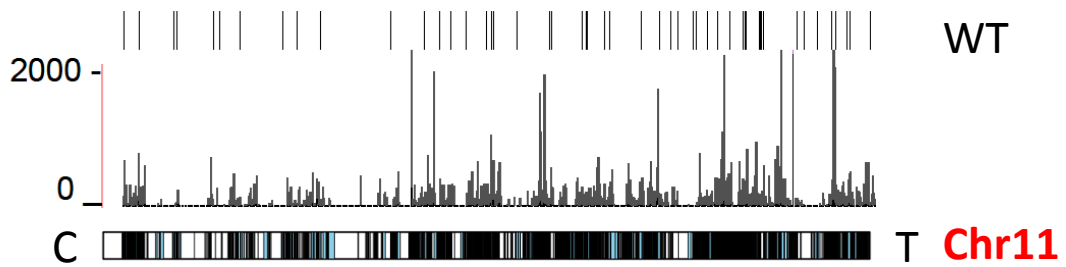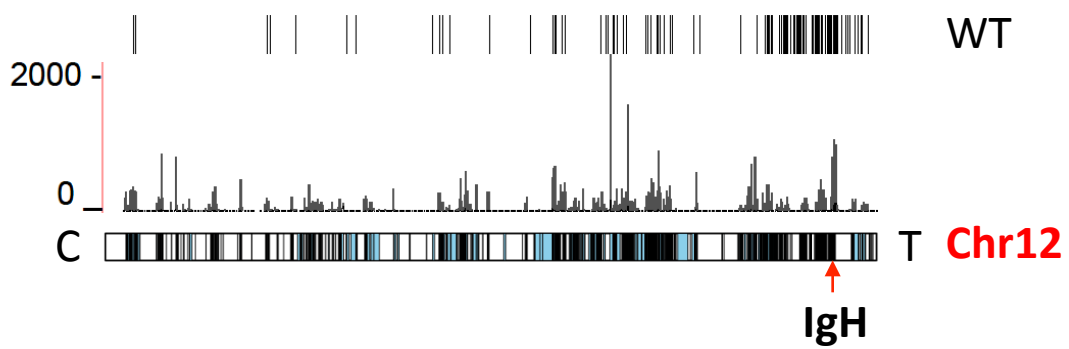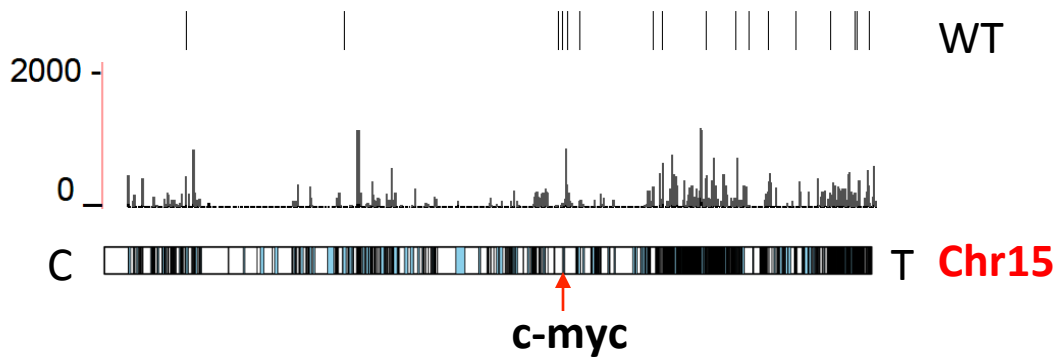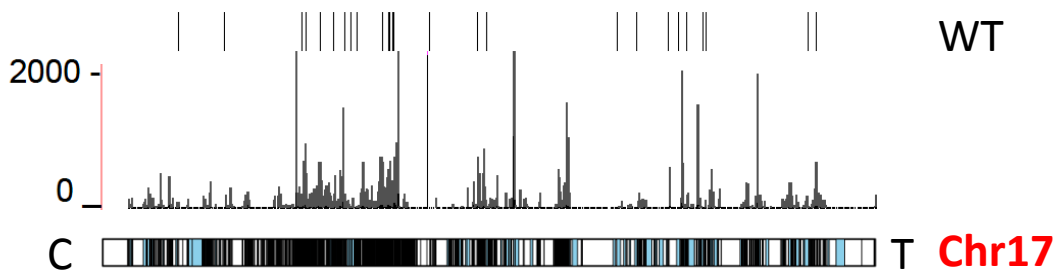

Supplement: NIHMS322291-supplement-02.pdf [file NIHMS322291-supplement-02.pdf]
